# Supplementary material for: Hypervolume Niche Dynamics and Global Invasion Risk of Phenacoccus solenopsis under Climate Change
Source: MDPI journal article supplement (doi:10.3390/insects15040250), 2024-04-05
Supplement: s1 [file s1]

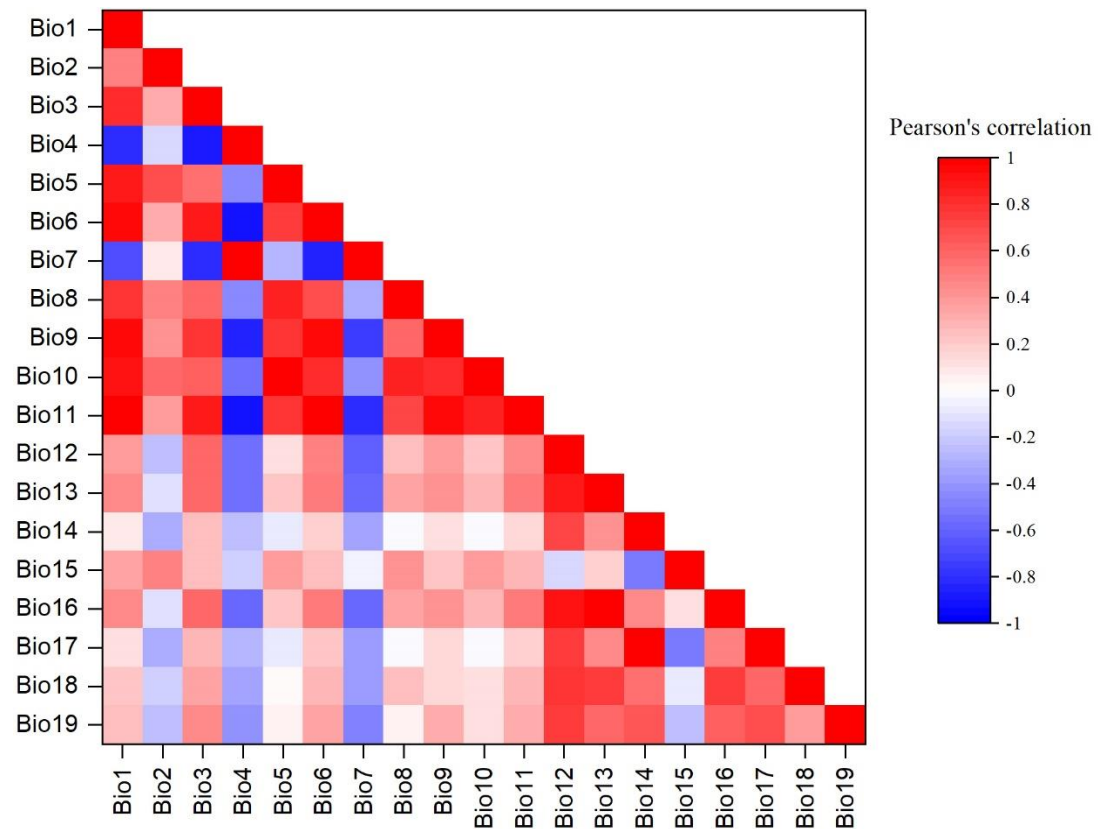

Figure S1 Pearson's correlation of 19 bioclimatic variables

Table S1 The eigenvectors of 19 bioclimatic variables in the first five principal components

| Variables | PC1    | PC2    | PC3    | PC4    | PC5    |
|-----------|--------|--------|--------|--------|--------|
| Bio1      | 0.010  | -0.022 | 0.007  | 0.009  | -0.003 |
| Bio2      | -0.001 | -0.003 | 0.003  | 0.003  | -0.003 |
| Bio3      | 0.017  | -0.026 | -0.001 | 0.004  | -0.005 |
| Bio4      | -0.468 | 0.876  | 0.008  | 0.076  | 0.034  |
| Bio5      | 0.003  | -0.011 | 0.006  | 0.014  | 0.002  |
| Bio6      | 0.016  | -0.031 | 0.002  | 0.006  | 0.000  |
| Bio7      | -0.013 | 0.020  | 0.004  | 0.008  | 0.001  |
| Bio8      | 0.005  | -0.008 | 0.016  | 0.008  | -0.011 |
| Bio9      | 0.013  | -0.032 | -0.006 | 0.012  | 0.008  |
| Bio10     | 0.004  | -0.011 | 0.006  | 0.011  | -0.001 |
| Bio11     | 0.015  | -0.032 | 0.006  | 0.009  | -0.001 |
| Bio12     | 0.772  | 0.409  | -0.073 | -0.167 | 0.341  |
| Bio13     | 0.118  | 0.043  | 0.158  | 0.270  | -0.051 |
| Bio14     | 0.023  | 0.025  | -0.067 | -0.126 | 0.044  |
| Bio15     | -0.002 | -0.026 | 0.084  | 0.133  | -0.068 |
| Bio16     | 0.321  | 0.126  | 0.375  | 0.633  | -0.098 |
| Bio17     | 0.081  | 0.083  | -0.222 | -0.406 | 0.142  |
| Bio18     | 0.166  | 0.153  | 0.449  | -0.481 | -0.717 |
| Bio19     | 0.179  | 0.103  | -0.752 | 0.249  | -0.574 |
